# Supplementary material for: A Prospective Study on 18F-DCFPyL PSMA PET/CT Imaging in Biochemical Recurrence of Prostate Cancer
Source: J Nucl Med. 2019 Nov;60(11):1587–93. doi: 10.2967/jnumed.119.226381 (PMC6836862; doi:10.2967/jnumed.119.226381)
Supplement: Supplementary file 1 [file jnm226381SupplementalData.pdf]

**Supplemental Table 1: Patient characteristics (additional subgroups)**

| Variable                                     | ADT naive  |    | Prior or ongoing ADT |    |
|----------------------------------------------|------------|----|----------------------|----|
|                                              | Value      | n  | Value                | n  |
| Age (years)                                  | 69.1±6.3   | 68 | 69.0±6.8             | 62 |
| Body weight (kg)                             | 86.8±15.1  | 68 | 88.2±13.6            | 62 |
| Height (cm)                                  | 177.3±6.0  | 68 | 177.3±7.6            | 62 |
| Injected activity (MBq)                      | 366.4±45.6 | 68 | 372.4±49.0           | 62 |
| Uptake time (min)                            | 120.5±1.8  | 68 | 120.3±0.9            | 62 |
|                                              |            |    |                      |    |
| Inclusion criteria†                          |            |    |                      |    |
| Known PC after radical prostatectomy with BR | 54 (79.4%) | 68 | 40 (64.5%)           | 62 |
| Known PC after radiation therapy with BR     | 14 (20.6%) | 68 | 23 (37.1%)           | 62 |
|                                              |            |    |                      |    |
| PSA at baseline (ng/mL)                      | 3.55±3.61  | 68 | 7.01±8.29            | 62 |
| PSA doubling time (months)                   | 15.3±13.8  | 55 | 9.3±8.7              | 58 |
|                                              |            |    |                      |    |
| Treatment history†                           |            |    |                      |    |
| Surgery                                      | 54 (79.4%) | 68 | 40 (64.5%)           | 62 |
| Radiotherapy†                                | 17 (25.0%) | 68 | 28 (45.2%)           | 62 |
| Brachytherapy                                | 13 (76.5%) | 17 | 14 (50.0%)           | 28 |
| External beam                                | 5 (29.4%)  | 17 | 15 (53.6%)           | 28 |
| IMRT                                         | 0 (0.0%)   | 17 | 4 (14.3%)            | 28 |
| Proton                                       | 0 (0.0%)   | 17 | 1 (3.6%)             | 28 |
| Radium-223                                   | 0 (0.0%)   | 17 | 0 (0.0%)             | 28 |
| Other                                        | 0 (0.0%)   | 17 | 0 (0.0%)             | 28 |
| ADT                                          | 0 (0.0%)   | 68 | 62 (100%)            | 62 |
| Chemotherapy                                 | 0 (0.0%)   | 68 | 1 (1.6%)             | 62 |

PC: prostate cancer; BR: biochemical recurrence; ADT: Androgen deprivation therapy; IMRT: Intensity-modulated radiation therapy. †Categories are not mutually exclusive.

**Supplemental Table 2: Staging and Gleason Score. Includes pathological TNM and Gleason score when available.**

|                  | All included |     | BR post RP only |    | BR post RT only |    | ADT Naive  |    | Prior or ongoing ADT |    |
|------------------|--------------|-----|-----------------|----|-----------------|----|------------|----|----------------------|----|
| Variable         | Value        | n   | Value           | n  | Value           | n  | Value      | n  | Value                | n  |
| Pathological TNM |              | 64  |                 | 63 |                 | 0  |            | 38 |                      | 26 |
| pT2*             | 0 (0.0%)     |     | 0 (0.0%)        |    | 0 (0.0%)        |    | 0 (0.0%)   |    | 0 (0.0%)             |    |
| pT2a             | 2 (3.1%)     |     | 2 (3.2%)        |    | 0 (0.0%)        |    | 0 (0.0%)   |    | 2 (7.7%)             |    |
| pT2b             | 3 (4.7%)     |     | 3 (4.8%)        |    | 0 (0.0%)        |    | 1 (2.6%)   |    | 2 (7.7%)             |    |
| pT2c             | 21 (32.8%)   |     | 21 (33.3%)      |    | 0 (0.0%)        |    | 14 (36.8%) |    | 7 (26.9%)            |    |
| pT3a             | 11 (17.2%)   |     | 11 (17.5%)      |    | 0 (0.0%)        |    | 7 (18.4%)  |    | 4 (15.4%)            |    |
| pT3b             | 27 (42.2%)   |     | 26 (41.3%)      |    | 0 (0.0%)        |    | 16 (42.1%) |    | 11 (42.3%)           |    |
| pT4              | 0 (0.0%)     |     | 0 (0.0%)        |    | 0 (0.0%)        |    | 0 (0.0%)   |    | 0 (0.0%)             |    |
|                  |              |     |                 |    |                 |    |            |    |                      |    |
| pNx              | 7 (10.9%)    |     | 7 (11.1%)       |    | 0 (0.0%)        |    | 3 (7.9%)   |    | 4 (15.4%)            |    |
| pN0              | 46 (71.9%)   |     | 46 (73.0%)      |    | 0 (0.0%)        |    | 29 (76.3%) |    | 17 (65.4%)           |    |
| pN1              | 11 (17.2%)   |     | 10 (15.9%)      |    | 0 (0.0%)        |    | 6 (15.8%)  |    | 5 (19.2%)            |    |
|                  |              |     |                 |    |                 |    |            |    |                      |    |
| Gleason score    |              | 129 |                 | 91 |                 | 35 |            | 67 |                      | 62 |
| 6                | 17 (13.2%)   |     | 8 (8.8%)        |    | 8 (22.9%)       |    | 8 (11.9%)  |    | 9 (14.5%)            |    |
| 7 (3+4)          | 28 (21.7%)   |     | 17 (18.7%)      |    | 11 (31.4%)      |    | 19 (28.4%) |    | 9 (14.5%)            |    |
| 7 (4+3)          | 37 (28.7%)   |     | 27 (29.7%)      |    | 9 (25.7%)       |    | 19 (28.4%) |    | 18 (29.0%)           |    |
| 8                | 13 (10.1%)   |     | 12 (13.2%)      |    | 1 (2.9%)        |    | 7 (10.4%)  |    | 6 (9.7%)             |    |
| 9                | 33 (25.6%)   |     | 26 (28.6%)      |    | 6 (17.1%)       |    | 13 (19.4%) |    | 20 (32.3%)           |    |
| 10               | 1 (0.8%)     |     | 1 (1.1%)        |    | 0 (0.0%)        |    | 1 (1.5%)   |    | 0 (0.0%)             |    |

\*Data not available to specify a or b stage.

**Supplemental Table 3: Qualitative assessment of scans (additional subgroups)**

|                        | ADT naive  |    | Prior or ongoing ADT |    |
|------------------------|------------|----|----------------------|----|
| Variable               | Value      | n  |                      |    |
| Number of lesions      |            | 68 |                      | 62 |
| 0                      | 14 (20.6%) |    | 6 (9.7%)             |    |
| 1                      | 26 (38.2%) |    | 27 (43.5%)           |    |
| 2                      | 7 (10.3%)  |    | 4 (6.5%)             |    |
| 3                      | 0 (0.0%)   |    | 6 (9.7%)             |    |
| 4                      | 1 (1.5%)   |    | 2 (3.2%)             |    |
| 5                      | 6 (8.8%)   |    | 1 (1.6%)             |    |
| 6-10                   | 10 (14.7%) |    | 4 (6.5%)             |    |
| >10                    | 4 (5.9%)   |    | 12 (19.4%)           |    |
|                        |            |    |                      |    |
| Sites of relapse†      |            | 68 |                      | 62 |
| Local                  | 17 (25.0%) |    | 18 (29.0%)           |    |
| Regional nodes         | 33 (48.5%) |    | 24 (38.7%)           |    |
| Distant nodes          | 14 (20.6%) |    | 18 (29.0%)           |    |
| Bone                   | 9 (13.2%)  |    | 17 (27.4%)           |    |
| Lung                   | 1 (1.5%)   |    | 2 (3.2%)             |    |
| Liver                  | 0 (0.0%)   |    | 0 (0.0%)             |    |
| Other                  | 1 (1.5%)   |    | 0 (0.0%)             |    |
|                        |            |    |                      |    |
| Diagnosis              |            | 68 |                      | 62 |
| Positive               | 54 (79.4%) |    | 56 (90.3%)           |    |
| Negative               | 14 (20.6%) |    | 6 (9.7%)             |    |
|                        |            |    |                      |    |
| Certainty of diagnosis |            | 68 |                      | 62 |
| High                   | 52 (76.5%) |    | 54 (87.1%)           |    |
| Moderate               | 11 (16.2%) |    | 6 (9.7%)             |    |
| Low                    | 5 (7.4%)   |    | 2 (3.2%)             |    |

**Supplemental Table 4: Proportion of positive scans based on PSA levels**

|                              | <b>All included</b> |          | <b>BR post RP only</b> |          | <b>BR post RT only</b> |          |
|------------------------------|---------------------|----------|------------------------|----------|------------------------|----------|
| <b>Variable</b>              | <b>Value</b>        | <b>n</b> | <b>Value</b>           | <b>n</b> | <b>Value</b>           | <b>n</b> |
|                              |                     |          |                        |          |                        |          |
| Proportion of positive scans |                     |          |                        |          |                        |          |
| >= 0.4 to < 0.5              | 60.0%               | 5        | 60.0%                  | 5        | -                      | 0        |
| >= 0.5 to < 1.0              | 78.3%               | 23       | 81.8%                  | 22       | -                      | 0        |
| >= 1.0 to < 2.0              | 72.0%               | 25       | 72.0%                  | 25       | -                      | 0        |
| >= 2.0                       | 92.2%               | 77       | 85.0%                  | 40       | 100%                   | 35       |
|                              |                     |          |                        |          |                        |          |
| >= 2.0 to < 5.0              | 84.8%               | 33       | 79.2%                  | 24       | 100.0%                 | 7        |
| >= 5.0 to < 10.0             | 96.2%               | 26       | 90.9%                  | 11       | 100.0%                 | 15       |
| >= 10.0 to < 15.0            | 100.0%              | 11       | 100.0%                 | 4        | 100.0%                 | 7        |
| >= 15.0 to < 20.0            | 100.0%              | 2        | -                      | 0        | 100.0%                 | 2        |
| >= 20.0 to < 25.0            | 100.0%              | 2        | 100.0%                 | 1        | 100.0%                 | 1        |
| >= 25.0 to < 30.0            | -                   | 0        | -                      | 0        | -                      | 0        |
| >= 30.0                      | 100.0%              | 3        | -                      | 0        | 100.0%                 | 3        |

**Supplemental Table 5: Characteristics of the five most active lesions of each scan and blood pool activity.**

| Variable                         | SUV       | SUL       | n   |
|----------------------------------|-----------|-----------|-----|
| Cardiac blood pool (mean uptake) | 1.22±0.22 | 0.93±0.15 | 130 |
|                                  |           |           |     |
| Lesion (max uptake)              |           |           | 290 |
| Mean                             | 12.43     | 9.29      |     |
| Minimum                          | 1.15      | 0.90      |     |
| Maximum                          | 85.04     | 62.39     |     |
| Standard deviation               | 12.34     | 9.01      |     |
|                                  |           |           |     |
| Lesion (peak uptake)             |           |           | 282 |
| Mean                             | 7.60      | 5.77      |     |
| Minimum                          | 0.86      | 0.69      |     |
| Maximum                          | 61.2      | 48.3      |     |
| Standard deviation               | 7.98      | 6.11      |     |

**Supplemental Table 6: List of adverse events**

| <b>Adverse event</b>                                                                                                             | <b>Severity</b> | <b>Resolved</b> | <b>Related</b> |
|----------------------------------------------------------------------------------------------------------------------------------|-----------------|-----------------|----------------|
| Tiredness after scan, resolved after sleeping                                                                                    | mild            | yes             | Unlikely       |
| Tiredness                                                                                                                        | mild            | yes             | Not related    |
| Tiredness & diarrhea overnight                                                                                                   | mild            | yes             | Not related    |
| Flu-like symptoms                                                                                                                | mild            | yes             | Unlikely       |
| Tiredness                                                                                                                        | mild            | yes             | Unlikely       |
| 'Floaters' in right eye                                                                                                          | mild            | yes             | Not related    |
| Headache and tired                                                                                                               | mild            | yes             | Unlikely       |
| Dark red blood blisters on left arm where injection made, no pain or discomfort.                                                 | mild            | yes             | Possibly       |
| Tiredness                                                                                                                        | mild            | yes             | Unlikely       |
| Palpitations                                                                                                                     | mild            | yes             | Not related    |
| Felt vertigo symptoms                                                                                                            | mild            | yes             | Unlikely       |
| Felt dizzy/nauseous                                                                                                              | mild            | yes             | Possibly       |
| Dizzy/nauseous - for 5 - 10 minutes after leaving the department.                                                                | mild            | yes             | Possibly       |
| Tired                                                                                                                            | mild            | yes             | Unlikely       |
| Chest pain*                                                                                                                      | mild            | yes             | Possibly       |
| Metallic taste in mouth                                                                                                          | mild            | yes             | Possibly       |
| Dizzy first thing in the morning                                                                                                 | mild            | yes             | Possibly       |
| Tired                                                                                                                            | mild            | yes             | Unlikely       |
| Tired and a bit 'worn out', loose stool, no nausea                                                                               | mild            | yes             | Unlikely       |
| Diarrhea                                                                                                                         | mild            | yes             | Unlikely       |
| Light headed about 1 hour after the injection. Felt better after laying down for 30 minutes on the scanner bed, during the scan. | mild            | yes             | Unlikely       |
| Headache                                                                                                                         | mild            | yes             | Unlikely       |
| Right lower back muscle ache.                                                                                                    | mild            | yes             | Unlikely       |
| Extra tired                                                                                                                      | mild            | yes             | Unlikely       |
| Tiredness/slightly dizzy*                                                                                                        | mild            | yes             | Possibly       |
| Low appetite/slight nausea*                                                                                                      | mild            | yes             | Possibly       |
| Arm sore from IV                                                                                                                 | mild            | yes             | Probably       |

\* The subjects did not think the symptoms were related to scan.  
Some subjects experienced more than one symptom.

**Supplemental Table 7: Changes in treatment intent, disease stage, investigation, decision-making or management plan (additional subgroups)**

| Variable                                            | ADT naive                   |    | Prior or ongoing ADT        |    |
|-----------------------------------------------------|-----------------------------|----|-----------------------------|----|
|                                                     | Value                       | n  |                             |    |
| Change in treatment intent                          | 20 (66.7%)                  | 30 | 16 (64.0%)                  | 25 |
| To Palliative                                       | 9 (45.0%)                   | 20 | 9 (56.3%)                   | 16 |
| To Curative                                         | 11 (55.0%)                  | 20 | 7 (43.8%)                   | 16 |
| Change in disease stage                             | 20 (66.7%)                  | 30 | 16 (64.0%)                  | 25 |
| Upstaged                                            | 18 (94.7%)                  | 19 | 16 (100%)                   | 16 |
| Downstaged                                          | 1 (5.3%)                    | 19 | 0 (0.0%)                    | 16 |
| Ordering of additional diagnostic studies†          | 8 (26.7%)                   | 30 | 5 (20.0%)                   | 25 |
| Computed tomography                                 | 2 (25.0%)                   | 8  | 2 (40.0%)                   | 5  |
| Magnetic resonance imaging                          | 4 (50.0%)                   | 8  | 1 (20.0%)                   | 5  |
| Nuclear medicine                                    | 1 (12.5%)                   | 8  | 0 (0.0%)                    | 5  |
| Ultrasound                                          | 0 (0.0%)                    | 8  | 0 (0.0%)                    | 5  |
| Biopsy                                              | 2 (25%)                     | 8  | 2 (40.0%)                   | 5  |
| Other*                                              | 0 (0.0%)                    | 8  | 1 (20.0%)                   | 5  |
| Imaging results changed plans for surgery or biopsy | 8 (26.7%)<br>NA: 7 (23.3%)  | 30 | 6 (24.0%)<br>NA: 6 (24.0%)  | 25 |
| Surgery or biopsy added                             | 5 (62.5%)                   | 8  | 4 (66.7%)                   | 6  |
| Surgery or biopsy cancelled                         | 3 (37.5%)                   | 8  | 2 (33.3%)                   | 6  |
| Other**                                             | 0 (0.0%)                    | 8  | 0 (0.0%)                    | 6  |
| Imaging results changed plans for systemic therapy  | 14 (46.7%)<br>NA: 2 (6.7%)  | 30 | 17 (68.0%)<br>NA: 1 (4.0%)  | 25 |
| Systemic therapy started                            | 11 (78.6%)                  | 14 | 12 (70.6%)                  | 17 |
| Systemic therapy not initiated/cancelled            | 3 (21.4%)                   | 14 | 5 (29.4%)                   | 17 |
| Systemic therapy changed                            | 0 (0.0%)                    | 14 | 0 (0.0%)                    | 17 |
| Imaging results changed plans for radiotherapy      | 12 (40.0%)<br>NA: 5 (16.7%) | 30 | 14 (56.0%)<br>NA: 4 (16.0%) | 25 |
| Radiotherapy added                                  | 6 (54.6%)                   | 11 | 7 (50.0%)                   | 14 |
| Radiotherapy cancelled                              | 3 (27.3%)                   | 11 | 6 (42.9%)                   | 14 |
| Radiotherapy prescription changed                   | 2 (18.2%)                   | 11 | 1 (7.1%)                    | 14 |
| Imaging results improved decision-making            | 26 (86.7%)                  | 30 | 23 (92.0%)                  | 25 |
| Imaging results changed subject's management plan   | 25 (83.3%)                  | 30 | 23 (92.0%)                  | 25 |

Note: one referring physician did not indicate on follow-up the detailed change in disease stage / plans for radiotherapy (awaiting biopsy).

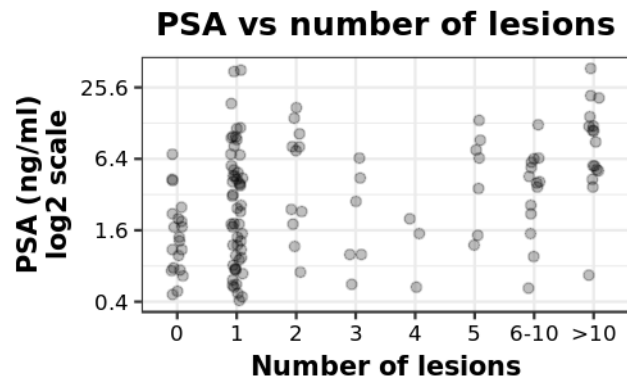

**Supplemental Figure 1. PSA vs number of lesions. This represents the PSA values (on a log<sub>2</sub> scale) in each number of lesions category.**

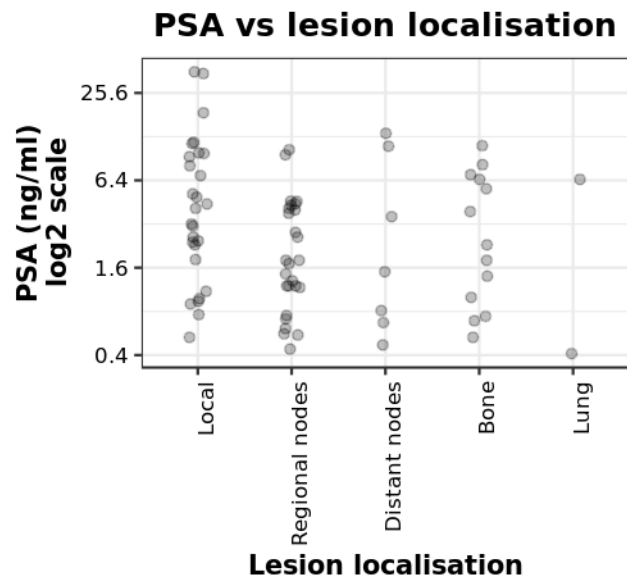

**Supplemental Figure 2. PSA vs lesion localisation. Presented lesion localisation are mutually exclusive (i.e. those subjects had lesions in only one localisation).**

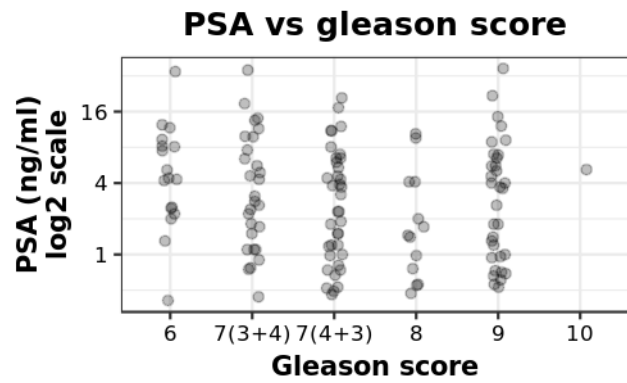

**Supplemental Figure 3. PSA vs Gleason score.**

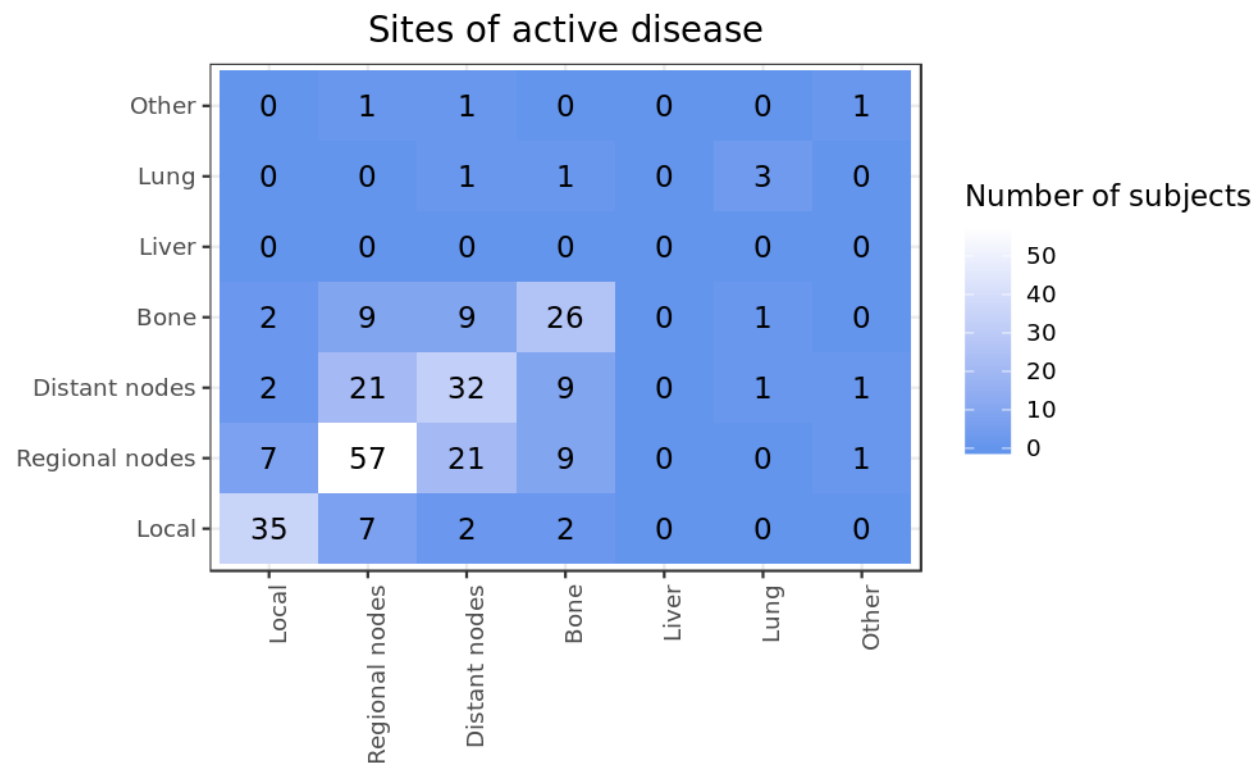

**Supplemental Figure 4.** Joint histogram of lesion distribution. The graph shows on the diagonal the number of subjects that had disease in the specified location. Each cell shows the number of subjects that had disease simultaneously in those two locations. Categories are not mutually exclusive (a subject may have disease in more than one location, some in more than two).

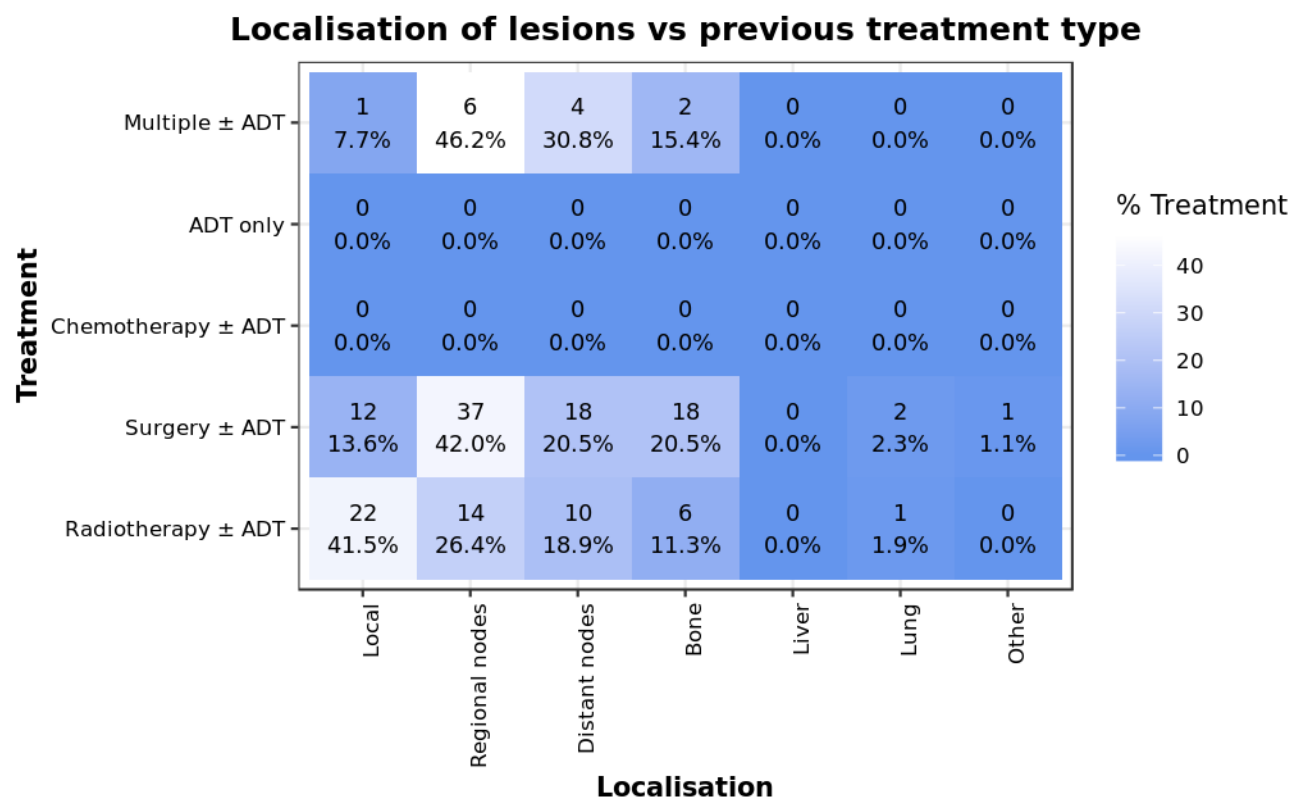

**Supplemental Figure 5.** Localization of lesions versus previous treatment types. The number in the cells represents the number of subjects that had a recurrence in the region specified on the horizontal axis for each treatment type. A subject may have had recurrence in more than one site. Calculated percentages are cumulative for treatments (calculated by adding cells in each row and dividing by total). When subjects had more than one treatment, they were aggregated in the "Multiple ± ADT" category and excluded from the other categories. ADT: androgen deprivation therapy.

## STARD STATEMENT CHECKLIST

| Section & Topic   | No  | Item                                                                                                                                                   | Item included                                                                              |
|-------------------|-----|--------------------------------------------------------------------------------------------------------------------------------------------------------|--------------------------------------------------------------------------------------------|
| Title or abstract |     |                                                                                                                                                        |                                                                                            |
|                   | 1   | Identification as a study of diagnostic accuracy using at least one measure of accuracy (such as sensitivity, specificity, predictive values, or AUC)  | Yes                                                                                        |
| Abstract          |     |                                                                                                                                                        |                                                                                            |
|                   | 2   | Structured summary of study design, methods, results, and conclusions (for specific guidance, see STARD for Abstracts)                                 | Yes                                                                                        |
| Introduction      |     |                                                                                                                                                        |                                                                                            |
|                   | 3   | Scientific and clinical background, including the intended use and clinical role of the index test                                                     | Yes                                                                                        |
|                   | 4   | Study objectives and hypotheses                                                                                                                        | Yes                                                                                        |
| Methods           |     |                                                                                                                                                        |                                                                                            |
| Study design      | 5   | Whether data collection was planned before the index test and reference standard were performed (prospective study) or after (retrospective study)     | Yes                                                                                        |
| Participants      | 6   | Eligibility criteria                                                                                                                                   | Yes                                                                                        |
|                   | 7   | On what basis potentially eligible participants were identified (such as symptoms, results from previous tests, inclusion in registry)                 | Yes                                                                                        |
|                   | 8   | Where and when potentially eligible participants were identified (setting, location and dates)                                                         | Yes<br>Study start date: August 3, 2017. Can be derived from clinicaltrial.gov identifier. |
|                   | 9   | Whether participants formed a consecutive, random or convenience series                                                                                | Yes                                                                                        |
| Test methods      | 10a | Index test, in sufficient detail to allow replication                                                                                                  | Yes                                                                                        |
|                   | 10b | Reference standard, in sufficient detail to allow replication                                                                                          | Not applicable<br>(no reference test)                                                      |
|                   | 11  | Rationale for choosing the reference standard (if alternatives exist)                                                                                  | Not applicable<br>(no reference test)                                                      |
|                   | 12a | Definition of and rationale for test positivity cut-offs or result categories of the index test, distinguishing pre-specified from exploratory         | Yes<br>Cutoffs not applicable<br>Result categories defined in methods.                     |
|                   | 12b | Definition of and rationale for test positivity cut-offs or result categories of the reference standard, distinguishing pre-specified from exploratory | Not applicable<br>(no reference test)                                                      |

|                   |     |                                                                                                                        |                                                                                               |
|-------------------|-----|------------------------------------------------------------------------------------------------------------------------|-----------------------------------------------------------------------------------------------|
|                   | 13a | Whether clinical information and reference standard results were available to the performers/readers of the index test | Yes                                                                                           |
|                   | 13b | Whether clinical information and index test results were available to the assessors of the reference standard          | Not applicable<br>(no reference test)                                                         |
| Analysis          | 14  | Methods for estimating or comparing measures of diagnostic accuracy                                                    | Yes                                                                                           |
|                   | 15  | How indeterminate index test or reference standard results were handled                                                | Not applicable<br>(no reference test)                                                         |
|                   | 16  | How missing data on the index test and reference standard were handled                                                 | Yes                                                                                           |
|                   | 17  | Any analyses of variability in diagnostic accuracy, distinguishing pre-specified from exploratory                      | Yes<br>(analyses were performed on data collected prospectively specified by study protocol). |
|                   | 18  | Intended sample size and how it was determined                                                                         | Yes. Stated that this is an interim analysis.                                                 |
| Results           |     |                                                                                                                        |                                                                                               |
| Participants      | 19  | Flow of participants, using a diagram                                                                                  | Described textually.                                                                          |
|                   | 20  | Baseline demographic and clinical characteristics of participants                                                      | Yes                                                                                           |
|                   | 21a | Distribution of severity of disease in those with the target condition                                                 | Yes                                                                                           |
|                   | 21b | Distribution of alternative diagnoses in those without the target condition                                            | Not applicable<br>(no reference test)                                                         |
|                   | 22  | Time interval and any clinical interventions between index test and reference standard                                 | Not applicable<br>(no reference test)                                                         |
| Test results      | 23  | Cross tabulation of the index test results (or their distribution) by the results of the reference standard            | Not applicable<br>(no reference test)                                                         |
|                   | 24  | Estimates of diagnostic accuracy and their precision (such as 95% confidence intervals)                                | Yes                                                                                           |
|                   | 25  | Any adverse events from performing the index test or the reference standard                                            | Yes (There were no adverse events)                                                            |
| Discussion        |     |                                                                                                                        |                                                                                               |
|                   | 26  | Study limitations, including sources of potential bias, statistical uncertainty, and generalisability                  | Yes                                                                                           |
|                   | 27  | Implications for practice, including the intended use and clinical role of the index test                              | Yes                                                                                           |
|                   |     |                                                                                                                        |                                                                                               |
| Other information |     |                                                                                                                        |                                                                                               |
|                   | 28  | Registration number and name of registry                                                                               | Yes                                                                                           |

|  |    |                                                       |                                                                                              |
|--|----|-------------------------------------------------------|----------------------------------------------------------------------------------------------|
|  | 29 | Where the full study protocol can be accessed         | Yes (information accessible on <a href="https://clinicaltrials.gov">clinicaltrials.gov</a> ) |
|  | 30 | Sources of funding and other support; role of funders | Yes.                                                                                         |
